# Supplementary material
Source: Springer Nature journal article supplement (https://www.springermedizin.de/resource/supplementary/12879_2004_158_MOESM4_ESM.pdf/9448276)

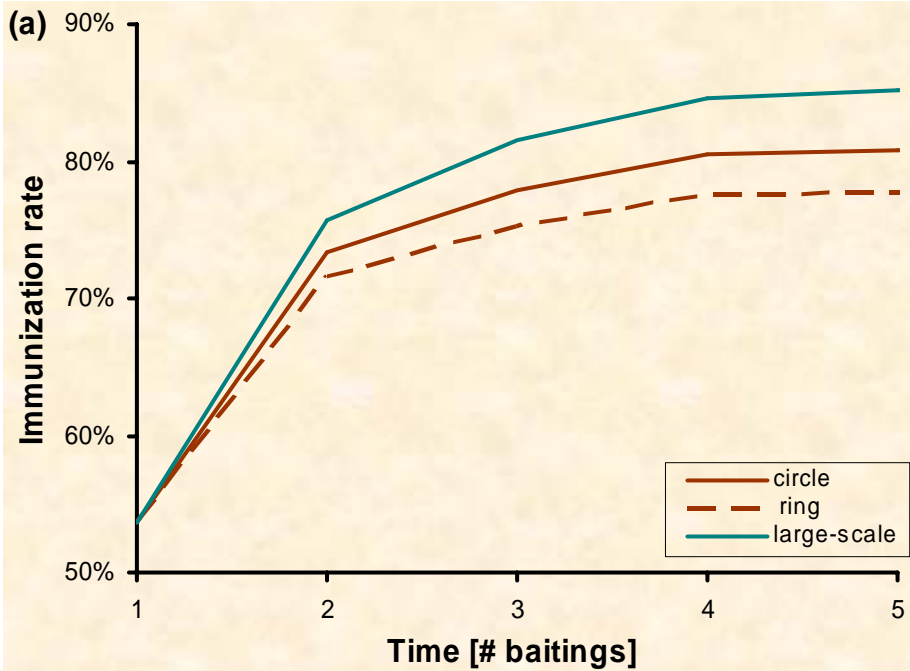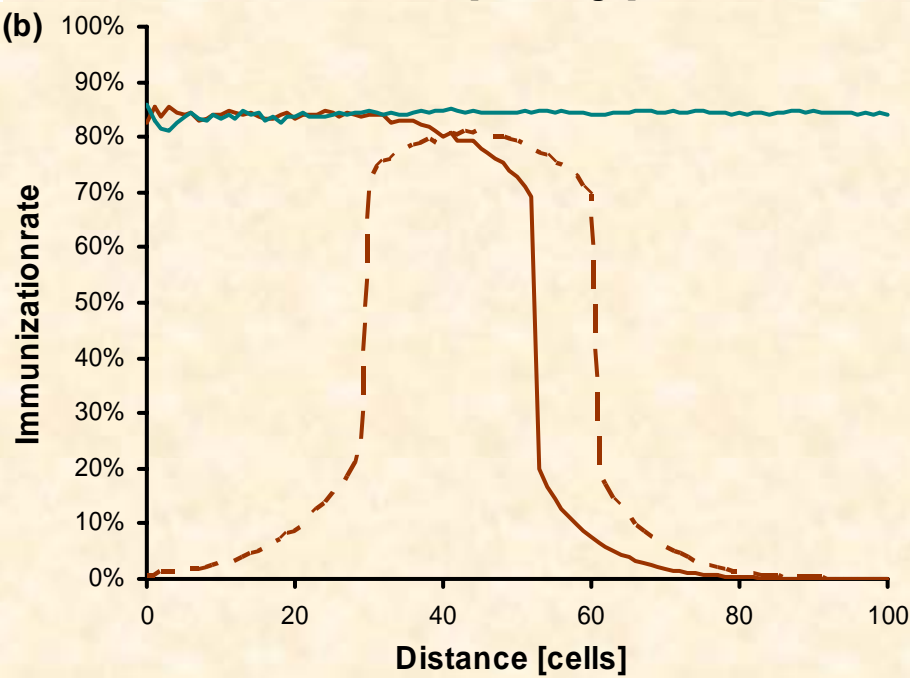

Supplement: MOESM4 [file 9448276]
